# Supplementary material
Source: PubMed Central journal article supplement (PMC2735100)

Fig. S1

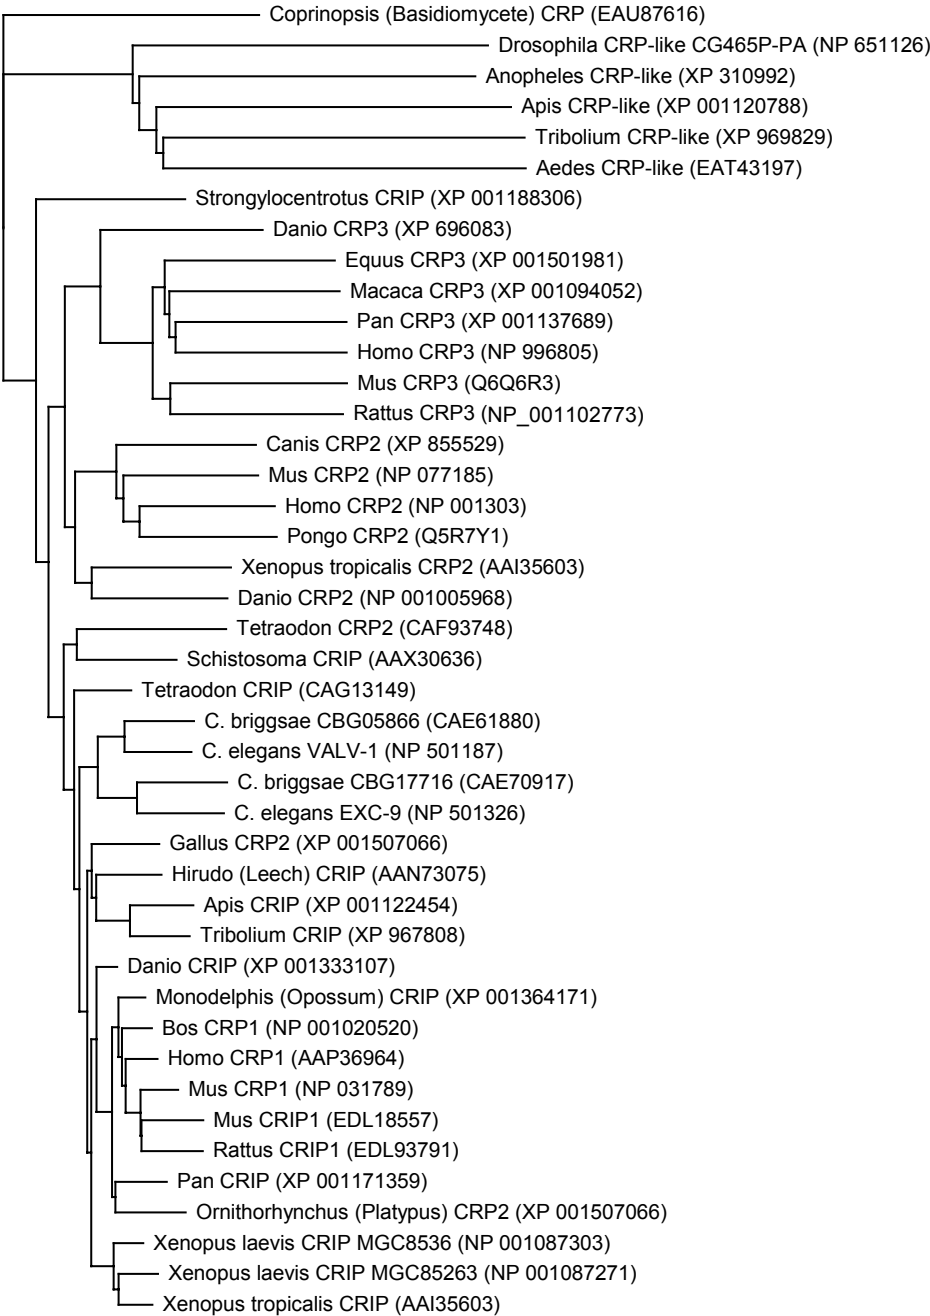

Supplement: NIHMS50235-supplement-01.pdf [file NIHMS50235-supplement-01.pdf]
